# Supplementary material for: <strong>Human Exposure to Toxic Metals and Microbiological Pollution via AC-filter Dust from Industrial, Residential and Agricultural Areas: Assessment of Health Risks</strong>
Source: Preprints.org preprint supplement (doi:10.20944/preprints202008.0571.v1), 2020-08-26
Supplement: Supplementary file 1 [file supplementary]

Table S1. Details of the AC-dust sampling sites

| Sample No. | Area                  | GPS Coordinates           |
|------------|-----------------------|---------------------------|
| 1          | Al-Nabiah             | 26°35'06.9"N 50°02'11.0"E |
| 2          |                       | 26°35'18.8"N 50°02'31.7"E |
| 3          |                       | 26°31'08.3"N 50°00'08.6"E |
| 4          |                       | 26°31'06.0"N 50°00'10.2"E |
| 5          | Al-Qatif-Agricultural | 26°29'37.5"N 50°01'50.7"E |
| 6          |                       | 26°27'44.3"N 50°01'33.4"E |
| 7          |                       | 26°31'36.8"N 49°59'37.9"E |
| 8          | Al-Qatif-Industrial   | 26°30'14.9"N 50°01'58.2"E |
| 9          |                       | 26°34'57.4"N 50°02'09.6"E |
| 10         |                       | 26°35'01.9"N 50°01'53.2"E |
| 11         |                       | 26°26'29.7"N 50°03'02.5"E |
| 12         | Al-Qatif-Residential  | 26°27'51.1"N 50°00'59.4"E |
| 13         |                       | 26°25'56.9"N 50°00'42.9"E |
| 14         |                       | 26°25'56.9"N 50°00'42.9"E |
| 15         | Saihat-Residential    | 26°30'47.6"N 49°59'42.5"E |
| 16         |                       | 26°30'50.3"N 49°59'22.6"E |
| 17         |                       | 26°30'39.2"N 49°59'01.8"E |
| 18         |                       | 26°30'18.0"N 50°02'04.1"E |

Table S2. Details about the AC filter dust sample such as area of the room, time span of filter replacement or cleaning, presence or absence of smoking, and cooking in the building etc.

| question                                                                                | Answer                                 | question                                                                                | answer                         |
|-----------------------------------------------------------------------------------------|----------------------------------------|-----------------------------------------------------------------------------------------|--------------------------------|
| Zone:                                                                                   | Residential                            | Zone:                                                                                   | Residential                    |
| Sample number:                                                                          | 1                                      | Sample number:                                                                          | 2                              |
| Site:                                                                                   | Saihat                                 | Site:                                                                                   | Saihat                         |
| Floor:                                                                                  | Ground floor                           | Floor:                                                                                  | Ground floor                   |
| Sample collector name:                                                                  | Hasan saho                             | Sample collector name:                                                                  | Hasan saho                     |
| Date-Time:                                                                              | 21/1/2019-7:30 PM                      | Date-Time:                                                                              | 21/1/2019-8:15 PM              |
| Air conditioner (AC)<br>company-type-weight :                                           | Media - split - 2 ton.                 | Air conditioner (AC)<br>company-type-weight :                                           | LG – split – 2 ton.            |
| When last time has the filter<br>been cleaned up?                                       | 12 months                              | When last time has the filter<br>been cleaned up?                                       | 6 months                       |
| Is there smoker in the<br>place?                                                        | No                                     | Is there smoker in the<br>place?                                                        | No                             |
| Do you cock in the place? if<br>you cock<br>How many times do you<br>cock in the place? | No cock                                | Do you cock in the place? if<br>you cock<br>How many times do you<br>cock in the place? | Yes<br>Five time in every week |
| Are there children or elderly<br>?                                                      | No                                     | Are there children or elderly<br>?                                                      | 2 children                     |
| How much of time do you<br>spend in the place?                                          | 8 hours                                | How much of time do you<br>spend in the place?                                          | 14-16 hours                    |
| When does the AC usually<br>run at morning-afternoon-<br>night ?                        | 4 hours at morning<br>4 hours at night | When does the AC usually<br>run at morning-afternoon-<br>night ?                        | Afternoon-night                |

  

| question                                                                                | Answer                           | question                                                                                | Answer                  |
|-----------------------------------------------------------------------------------------|----------------------------------|-----------------------------------------------------------------------------------------|-------------------------|
| Zone:                                                                                   | Residential                      | Zone:                                                                                   | Residential             |
| Sample number:                                                                          | 3                                | Sample number:                                                                          | 4                       |
| Site:                                                                                   | Saihat                           | Site:                                                                                   | Saihat                  |
| Floor:                                                                                  | Ground floor                     | Floor:                                                                                  | Ground floor            |
| Sample collector name:                                                                  | Hasan saho                       | Sample collector name:                                                                  | Hasan saho              |
| Date-Time:                                                                              | 21/1/2019-10:00 PM               | Time:                                                                                   | 21/1/2019-10:25PM       |
| Air conditioner (AC)<br>company-type-weight :                                           | Mitsubishi – window-1.5<br>ton . | Air conditioner (AC)<br>company-type-weight :                                           | Gree – split – 2 tons.  |
| When last time has the filter<br>been cleaned up?                                       | 16 months                        | When last time has the filter<br>been cleaned up?                                       | 7 months                |
| Is there smoker in the<br>place?                                                        | No                               | Is there smoker in the<br>place?                                                        | No                      |
| Do you cock in the place? if<br>you cock<br>How many times do you<br>cock in the place? | Yes<br>Every day                 | Do you cock in the place? if<br>you cock<br>How many times do you<br>cock in the place? | Every day except Friday |
| Are there children or elderly<br>?                                                      | 1 child                          | Are there children or elderly<br>?                                                      | 3 children              |
| How much of time do you<br>spend in the place?                                          | 12-14 hours                      | How much of time do you<br>spend in the place?                                          | 12-16 hours             |
| When does the AC usually<br>run at morning-afternoon-<br>night ?                        | Afternoon-night                  | When does the AC usually<br>run at morning-afternoon-<br>night ?                        | Afternoon-night         |

| question                                                                                | Answer                                  |
|-----------------------------------------------------------------------------------------|-----------------------------------------|
| Zone:                                                                                   | Industrial                              |
| Sample number:                                                                          | 7                                       |
| Site:                                                                                   | Qatif                                   |
| Floor:                                                                                  | Ground floor                            |
| Sample collector name:                                                                  | Mustafa al-hassan                       |
| Date-Time:                                                                              | 20/1/2019-7:40 PM                       |
| Air conditioner (AC)<br>company-type-weight :                                           | daewoo – window – 2 tons.               |
| When last time has the filter<br>been cleaned up?                                       | 20 months                               |
| Is there smoker in the<br>place?                                                        | No                                      |
| Do you cock in the place? if<br>you cock<br>How many times do you<br>cock in the place? | No                                      |
| Are there children or elderly<br>?                                                      | No                                      |
| How much of time do you<br>spend in the place?                                          | 8 hours                                 |
| When does the AC usually<br>run at morning-afternoon-<br>night ?                        | 4 hours at morning<br>4 hours afternoon |
| comment                                                                                 | For Painting metal                      |

| question                                                                                | Answer                                  |
|-----------------------------------------------------------------------------------------|-----------------------------------------|
| Zone:                                                                                   | Industrial                              |
| Sample number:                                                                          | 5                                       |
| Site:                                                                                   | Qatif                                   |
| Floor:                                                                                  | Ground floor                            |
| Sample collector name:                                                                  | Mustafa al-hassan                       |
| Date-Time:                                                                              | 20/1/2019-7:00 PM                       |
| Air conditioner (AC)<br>company-type-weight :                                           | Al-zameel – window – 1.5<br>ton.        |
| When last time has the filter<br>been cleaned up?                                       | 3 months                                |
| Is there smoker in the<br>place?                                                        | Some costumers                          |
| Do you cock in the place? if<br>you cock<br>How many times do you<br>cock in the place? | No                                      |
| Are there children or elderly<br>?                                                      | No                                      |
| How much of time do you<br>spend in the place?                                          | 8 hours                                 |
| When does the AC usually<br>run at morning-afternoon-<br>night ?                        | 4 hours at morning<br>4 hours afternoon |
| comment                                                                                 | For Car maintaince                      |

| question                                                                                | Answer                                  |
|-----------------------------------------------------------------------------------------|-----------------------------------------|
| Zone:                                                                                   | Industrial                              |
| Sample number:                                                                          | 8                                       |
| Site:                                                                                   | Qatif                                   |
| Floor:                                                                                  | Ground floor                            |
| Sample collector name:                                                                  | Mustafa al-hassan                       |
| Date-Time:                                                                              | 20/1/2019-7:55 PM                       |
| Air conditioner (AC)<br>company-type-weight :                                           | media – window – 2 tons.                |
| When last time has the filter<br>been cleaned up?                                       | 6 months                                |
| Is there smoker in the<br>place?                                                        | No                                      |
| Do you cock in the place? if<br>you cock<br>How many times do you<br>cock in the place? | No                                      |
| Are there children or elderly<br>?                                                      | No                                      |
| How much of time do you<br>spend in the place?                                          | 8 hours                                 |
| When does the AC usually<br>run at morning-afternoon-<br>night ?                        | 4 hours at morning<br>4 hours afternoon |
| comment                                                                                 | For manufacturing plastic               |

| question                                                                                | Answer                                  |
|-----------------------------------------------------------------------------------------|-----------------------------------------|
| Zone:                                                                                   | Industrial                              |
| Sample number:                                                                          | 6                                       |
| Site:                                                                                   | Qatif                                   |
| Floor:                                                                                  | Ground floor                            |
| Sample collector name:                                                                  | Mustafa al-hassan                       |
| Date-Time:                                                                              | 20/1/2019-7:30 PM                       |
| Air conditioner (AC)<br>company-type-weight :                                           | LG – window – 2 tons.                   |
| When last time has the filter<br>been cleaned up?                                       | 4 months                                |
| Is there smoker in the<br>place?                                                        | No                                      |
| Do you cock in the place? if<br>you cock<br>How many times do you<br>cock in the place? | No                                      |
| Are there children or elderly<br>?                                                      | No                                      |
| How much of time do you<br>spend in the place?                                          | 8 hours                                 |
| When does the AC usually<br>run at morning-afternoon-<br>night ?                        | 4 hours at morning<br>4 hours afternoon |
| Comment                                                                                 | For Manufacturing glass                 |

| question                                                                                | Answer                         |
|-----------------------------------------------------------------------------------------|--------------------------------|
| Zone:                                                                                   | Residential                    |
| Sample number:                                                                          | 11                             |
| Site:                                                                                   | Qatif                          |
| Floor:                                                                                  | Ground floor                   |
| Sample collector name:                                                                  | Ali Al-ekhwan                  |
| Date-Time:                                                                              | 22/1/2019-5:30 PM              |
| Air conditioner (AC)<br>company-type-weight :                                           | samsung – window – 2.0<br>tons |
| When last time has the filter<br>been cleaned up?                                       | 18 months                      |
| Is there smoker in the<br>place?                                                        | No                             |
| Do you cock in the place? if<br>you cock<br>How many times do you<br>cock in the place? | 4 times in a week              |
| Are there children or elderly<br>?                                                      | 2                              |
| How much of time do you<br>spend in the place?                                          | 14 hours                       |
| When does the AC usually<br>run at morning-afternoon-<br>night ?                        | Morning                        |

| question                                                                                | Answer                  |
|-----------------------------------------------------------------------------------------|-------------------------|
| Zone:                                                                                   | Agriculture             |
| Sample number:                                                                          | 12                      |
| Site:                                                                                   | Qatif                   |
| Floor:                                                                                  | Ground floor            |
| Sample collector name:                                                                  | Ali al-ekhwan           |
| Date-Time:                                                                              | 23/1/2019-5:30 PM       |
| Air conditioner (AC)<br>company-type-weight :                                           | Al-zameel-window-2 tons |
| When last time has the filter<br>been cleaned up?                                       | Never been cleaned      |
| Is there smoker in the<br>place?                                                        | No                      |
| Do you cock in the place? if<br>you cock<br>How many times do you<br>cock in the place? | Every day               |
| Are there children or elderly<br>?                                                      | No                      |
| How much of time do you<br>spend in the place?                                          | 16 hours                |
| When does the AC usually<br>run at morning-afternoon-<br>night ?                        | Night                   |

| question                                                                                | answer                    |
|-----------------------------------------------------------------------------------------|---------------------------|
| Zone:                                                                                   | Residential               |
| Sample number:                                                                          | 9                         |
| Site:                                                                                   | Qatif                     |
| Floor:                                                                                  | Ground floor              |
| Sample collector name:                                                                  | Ali Al-ekhwan             |
| Date-Time:                                                                              | 22/1/2019 4:00 PM         |
| Air conditioner (AC)<br>company-type-weight :                                           | Daikin – split – 2.5 tons |
| When last time has the filter<br>been cleaned up?                                       | 12 months                 |
| Is there smoker in the<br>place?                                                        | No                        |
| Do you cock in the place? if<br>you cock<br>How many times do you<br>cock in the place? | 3-4 times in a week       |
| Are there children or elderly<br>?                                                      | 2                         |
| How much of time do you<br>spend in the place?                                          | 10-12 hours               |
| When does the AC usually<br>run at morning-afternoon-<br>night ?                        | Night                     |

| question                                                                                | Answer                  |
|-----------------------------------------------------------------------------------------|-------------------------|
| Zone:                                                                                   | Residential             |
| Sample number:                                                                          | 15                      |
| Site:                                                                                   | Al-nabiah               |
| Floor:                                                                                  | Ground floor            |
| Sample collector name:                                                                  | Abdullah al-qahtani     |
| Date-Time:                                                                              | 23/1/2019-8:15 PM       |
| Air conditioner (AC)<br>company-type-weight :                                           | craft-split-2.5 tons    |
| When last time has the filter<br>been cleaned up?                                       | 4 months                |
| Is there smoker in the<br>place?                                                        | 1                       |
| Do you cock in the place? if<br>you cock<br>How many times do you<br>cock in the place? | Every day except Friday |
| Are there children or elderly<br>?                                                      | 1                       |
| How much of time do you<br>spend in the place?                                          | 12 hours                |
| When does the AC usually<br>run at morning-afternoon-<br>night ?                        | Afternoon               |

| question                                                                                | Answer                   |
|-----------------------------------------------------------------------------------------|--------------------------|
| Zone:                                                                                   | Residential              |
| Sample number:                                                                          | 10                       |
| Site:                                                                                   | Qatif                    |
| Floor:                                                                                  | Ground floor             |
| Sample collector name:                                                                  | Ali Al-ekhwan            |
| Date-Time:                                                                              | 22/1/2019 5:10 PM        |
| Air conditioner (AC)<br>company-type-weight :                                           | Ariston – split – 3 tons |
| When last time has the filter<br>been cleaned up?                                       | 4 months                 |
| Is there smoker in the<br>place?                                                        | 1                        |
| Do you cock in the place? if<br>you cock<br>How many times do you<br>cock in the place? | No                       |
| Are there children or elderly<br>?                                                      | No                       |
| How much of time do you<br>spend in the place?                                          | 12 hours                 |
| When does the AC usually<br>run at morning-afternoon-<br>night ?                        | Overnight                |

| question                                                                                | Answer                    |
|-----------------------------------------------------------------------------------------|---------------------------|
| Zone:                                                                                   | Residential               |
| Sample number:                                                                          | 16                        |
| Site:                                                                                   | Al-nabiah                 |
| Floor:                                                                                  | Ground floor              |
| Sample collector name:                                                                  | Abdullah al-qahtani       |
| Date-Time:                                                                              | 23/1/2019-9:00 PM         |
| Air conditioner (AC)<br>company-type-weight :                                           | whirlpool-window-1.5 tons |
| When last time has the filter<br>been cleaned up?                                       | 4 months                  |
| Is there smoker in the<br>place?                                                        | No                        |
| Do you cock in the place? if<br>you cock<br>How many times do you<br>cock in the place? | Every day except weekend  |
| Are there children or elderly<br>?                                                      | No                        |
| How much of time do you<br>spend in the place?                                          | 9 hours                   |
| When does the AC usually<br>run at morning-afternoon-<br>night ?                        | Night                     |

| question                                                                                | Answer                |
|-----------------------------------------------------------------------------------------|-----------------------|
| Zone:                                                                                   | residential           |
| Sample number:                                                                          | 17                    |
| Site:                                                                                   | Al-nabiah             |
| Floor:                                                                                  | Ground floor          |
| Sample collector name:                                                                  | Abdullah al-qahtani   |
| Date-Time:                                                                              | 23/1/2019-9:25 PM     |
| Air conditioner (AC)<br>company-type-weight :                                           | Lloyd-window-1.5 tons |
| When last time has the filter<br>been cleaned up?                                       | 11 month              |
| Is there smoker in the<br>place?                                                        | No                    |
| Do you cock in the place? if<br>you cock<br>How many times do you<br>cock in the place? | 3-4 days in a week    |
| Are there children or elderly<br>?                                                      | 3                     |
| How much of time do you<br>spend in the place?                                          | 15 hours              |
| When does the AC usually<br>run at morning-afternoon-<br>night ?                        | Morning               |

| question                                                                                | answer                  |
|-----------------------------------------------------------------------------------------|-------------------------|
| Zone:                                                                                   | Agriculture             |
| Sample number:                                                                          | 13                      |
| Site:                                                                                   | Qatif                   |
| Floor:                                                                                  | Ground floor            |
| Sample collector name:                                                                  | Ali al-ekhwani          |
| Date-Time:                                                                              | 23/1/2019-5:50 PM       |
| Air conditioner (AC)<br>company-type-weight :                                           | comfort-window-1.5 tons |
| When last time has the filter<br>been cleaned up?                                       | Never been cleaned      |
| Is there smoker in the<br>place?                                                        | 2                       |
| Do you cock in the place? if<br>you cock<br>How many times do you<br>cock in the place? | Every day               |
| Are there children or elderly<br>?                                                      | No                      |
| How much of time do you<br>spend in the place?                                          | 15 hours                |
| When does the AC usually<br>run at morning-afternoon-<br>night ?                        | Night                   |

| question                                                                                | Answer                |
|-----------------------------------------------------------------------------------------|-----------------------|
| Zone:                                                                                   | Residential           |
| Sample number:                                                                          | 18                    |
| Site:                                                                                   | Al-nabiah             |
| Floor:                                                                                  | Ground floor          |
| Sample collector name:                                                                  | Abdullah al-qahtani   |
| Date-Time:                                                                              | 23/1/2019-9:40 PM     |
| Air conditioner (AC)<br>company-type-weight :                                           | hitachi-window-2 tons |
| When last time has the filter<br>been cleaned up?                                       | 2 month               |
| Is there smoker in the<br>place?                                                        | 1                     |
| Do you cock in the place? if<br>you cock<br>How many times do you<br>cock in the place? | Every day             |
| Are there children or elderly<br>?                                                      | No                    |
| How much of time do you<br>spend in the place?                                          | 13 hours              |
| When does the AC usually<br>run at morning-afternoon-<br>night ?                        | Afternoon-Night       |

| question                                                                                | Answer                  |
|-----------------------------------------------------------------------------------------|-------------------------|
| Zone:                                                                                   | Agriculture             |
| Sample number:                                                                          | 14                      |
| Site:                                                                                   | Qatif                   |
| Floor:                                                                                  | Ground floor            |
| Sample collector name:                                                                  | Ali al-ekhwani          |
| Date-Time:                                                                              | 23/1/2019-7:00 PM       |
| Air conditioner (AC)<br>company-type-weight :                                           | comfort-window-1.5 tons |
| When last time has the filter<br>been cleaned up?                                       | 3 years                 |
| Is there smoker in the<br>place?                                                        | 1                       |
| Do you cock in the place? if<br>you cock<br>How many times do you<br>cock in the place? | Every day               |
| Are there children or elderly<br>?                                                      | No                      |
| How much of time do you<br>spend in the place?                                          | 12-14 hours             |
| When does the AC usually<br>run at morning-afternoon-<br>night ?                        | Night                   |

Table S3. Parameters along with symbols and values used to estimate the health risk.

| Parameters                        | Symbol    | Units                                 | Values                                                                                                                                                                                                                                                                                                                                                                                                                                                                                                                                                                                                                | References                                                                  |
|-----------------------------------|-----------|---------------------------------------|-----------------------------------------------------------------------------------------------------------------------------------------------------------------------------------------------------------------------------------------------------------------------------------------------------------------------------------------------------------------------------------------------------------------------------------------------------------------------------------------------------------------------------------------------------------------------------------------------------------------------|-----------------------------------------------------------------------------|
| Concentrations of toxic metals    | C         | mg kg <sup>-1</sup>                   |                                                                                                                                                                                                                                                                                                                                                                                                                                                                                                                                                                                                                       |                                                                             |
| Reference doses                   | Rfd       | mg kg <sup>-1</sup> day <sup>-1</sup> | Oral RfD:<br>1.0×10 <sup>-3</sup> (Cd)<br>3.0×10 <sup>-3</sup> (Cr),<br>3.7×10 <sup>-2</sup> (Cu)<br>2.4×10 <sup>-2</sup> (Mn),<br>3.5×10 <sup>-3</sup> (Pb),<br>3.0×10 <sup>-1</sup> (Zn),<br>Dermal RfD:<br>1.0×10 <sup>-5</sup> (Cd),<br>6.00×10 <sup>-5</sup> (Cr),<br>0.012 (Cu)<br>4.6×10 <sup>-2</sup> (Mn),<br>5.25×10 <sup>-5</sup> (Pb),<br>6.0×10 <sup>-2</sup> (Zn),<br>Inhalation RfD:<br>1.0×10 <sup>-5</sup> (Cd),<br>3.00×10 <sup>-3</sup> (Cr),<br>0.04 (Cu)<br>5.0×10 <sup>-5</sup> (Mn),<br>3.5×10 <sup>-3</sup> (Pb),<br>3.0×10 <sup>-2</sup> (Zn),<br>Ingestion SF:<br>8.5×10 <sup>-3</sup> (Pb) | Askarova and Mussagaliyeva, (2014); Ferreira-Baptista and De Miguel, (2005) |
| Slope factor (SF)                 | SF        | mg kg <sup>-1</sup> day <sup>-1</sup> | Inhalation SF:<br>6.3 (Cd),<br>42 (Cr),<br>Ingestion SF:<br>8.5×10 <sup>-3</sup> (Pb)<br>0.1 (Cd), Cr (0.04), Cu (0.1), Mn (0.001), Pb (0.006) and (0.02) Zn                                                                                                                                                                                                                                                                                                                                                                                                                                                          | Ferreira-Baptista and De Miguel, (2005); Lu et al., (2014); USDOE, (2011)   |
| Dermal absorption factor          | ABS       | Unit less                             |                                                                                                                                                                                                                                                                                                                                                                                                                                                                                                                                                                                                                       |                                                                             |
| Exposed skin exposed surface area | SA        | m <sup>2</sup>                        | 5700 <sup>a</sup> , 2800 <sup>b</sup>                                                                                                                                                                                                                                                                                                                                                                                                                                                                                                                                                                                 | Askarova and Mussagaliyeva, (2014);                                         |
| Inhalation rate                   | InhR      | m <sup>3</sup> day <sup>-1</sup>      | 20 <sup>a</sup> , 7.6 <sup>b</sup>                                                                                                                                                                                                                                                                                                                                                                                                                                                                                                                                                                                    | USEPA (2002); Zheng et al., (2010)                                          |
| Exposure frequency                | EF        | Day year <sup>-1</sup>                | 350                                                                                                                                                                                                                                                                                                                                                                                                                                                                                                                                                                                                                   | US-EPA, (2002)                                                              |
| Exposure duration                 | ED        | Year                                  | 30 <sup>a</sup> , 6 <sup>b</sup>                                                                                                                                                                                                                                                                                                                                                                                                                                                                                                                                                                                      | US-EPA, (2002)                                                              |
| Average time cancer               | ATcan     | Days                                  | 70 × 365                                                                                                                                                                                                                                                                                                                                                                                                                                                                                                                                                                                                              | US-EPA, (2002)                                                              |
| Average time non cancer           | ATnon can | Days                                  | 30 × 365                                                                                                                                                                                                                                                                                                                                                                                                                                                                                                                                                                                                              | US-EPA, (2002)                                                              |

<sup>a</sup>Adults and <sup>b</sup>Children
